# Supplementary material for: Molecular Docking and Multivariate Analysis of Xanthones as Antimicrobial and Antiviral Agents
Source: PubMed Central journal article supplement (PMC6332503; doi:10.3390/molecules200713165), 2015-07-21
Supplement: molecules-20-13165-s001.pdf [file molecules-20-13165-s001.pdf]

# Supplementary Materials

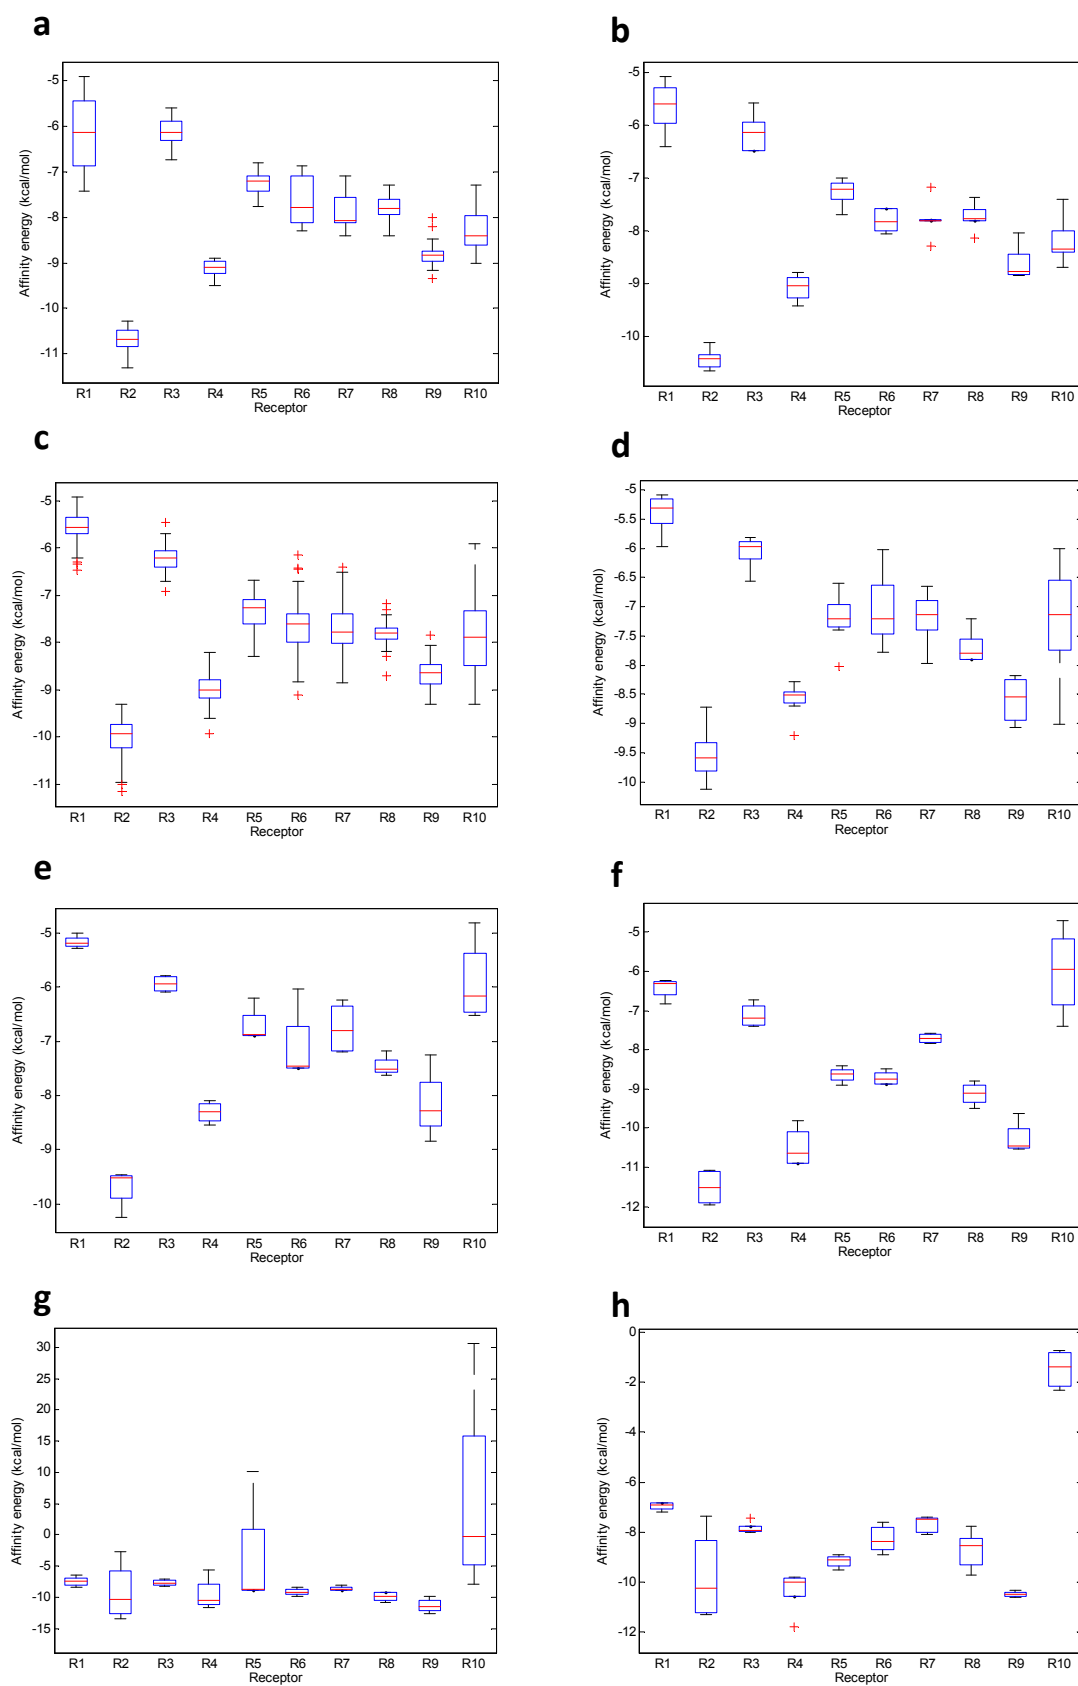

**Figure S1.** Boxplot of affinity energy values datasets for R1-R10. (a) DX; (b) TrX; (c) TeX; (d) PeX; (e) HX; (f) PePX; (g) Dim; (h) XD.

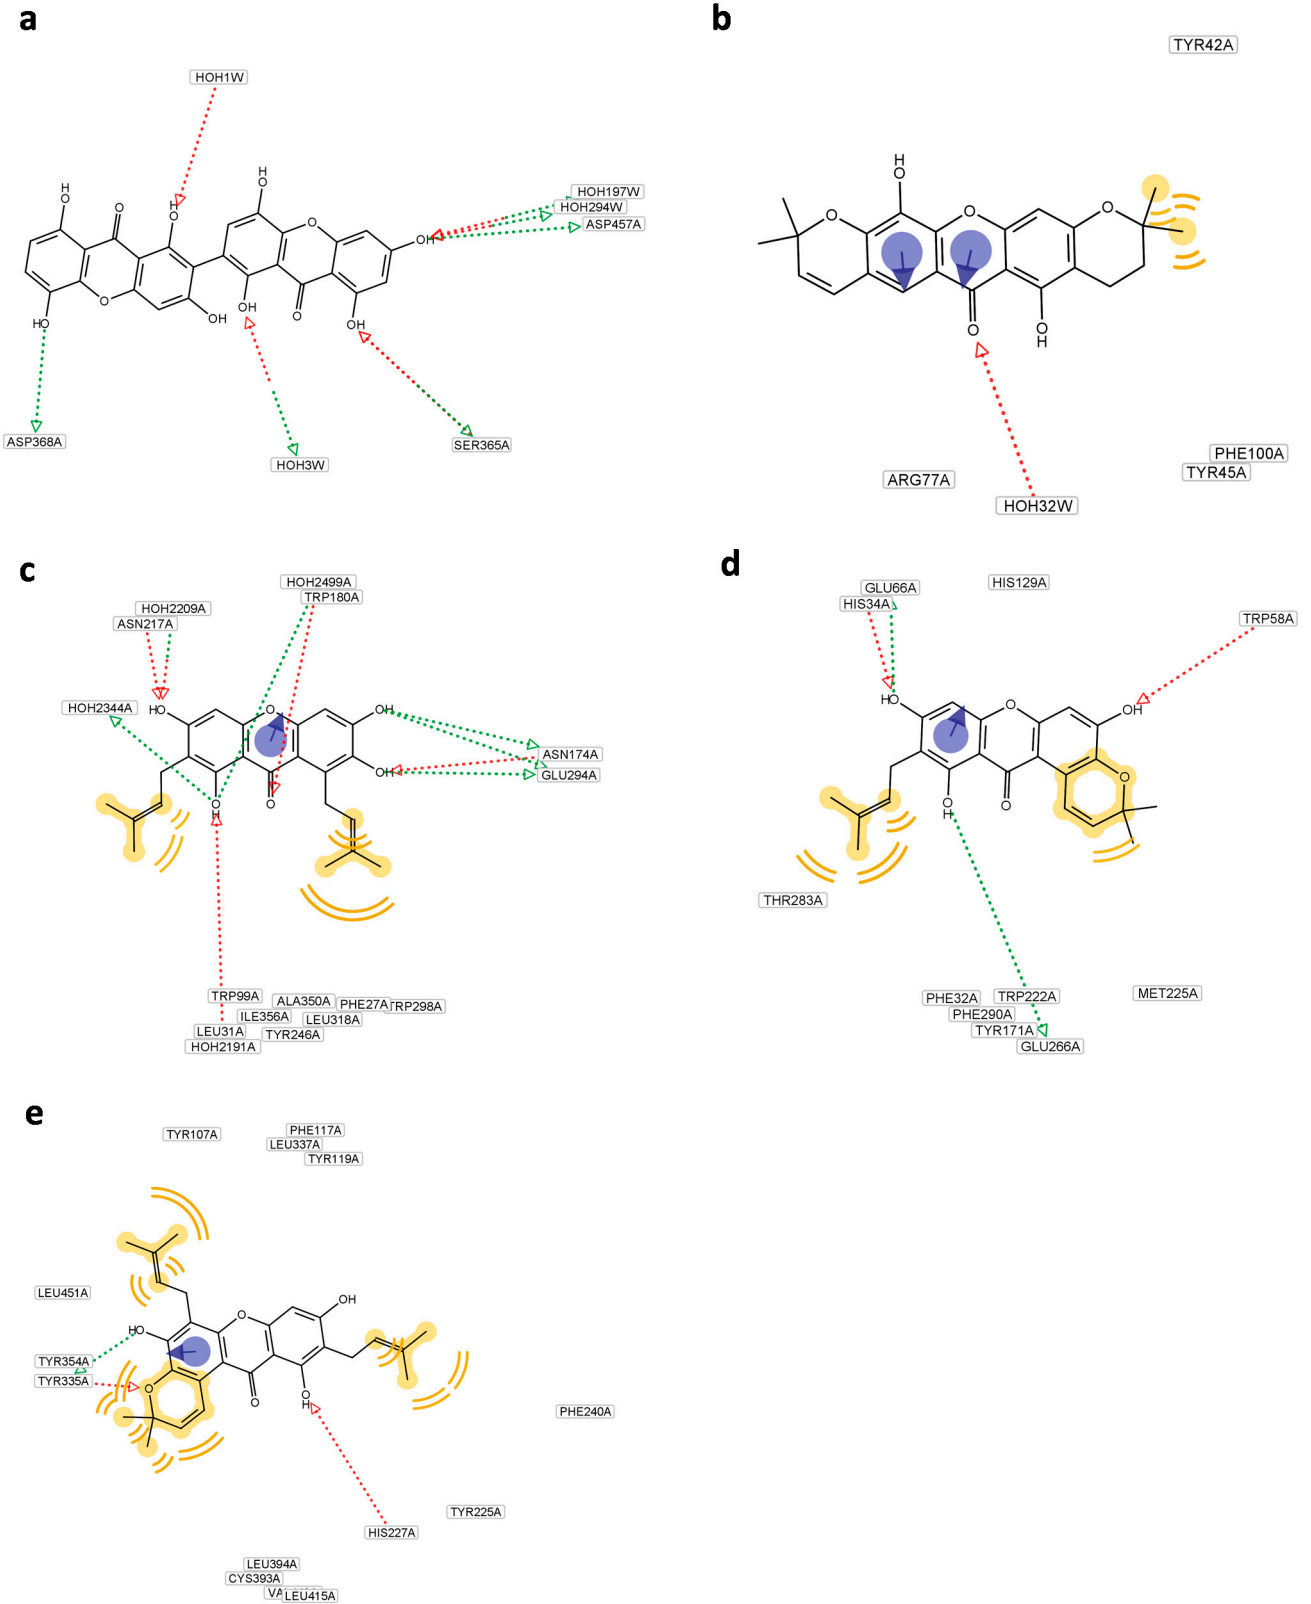

**Figure S2.** Residual interaction maps for some xanthones. (a) 266—R1; (b) 214—R3; (c) 166—R5; (d) 225—R6; (e) 256—R9.

**Table S1.** Systematic name of the tested xanthenes.

| <b>ID</b> | <b>Name</b>                                   | <b>ID</b> | <b>Name</b>                                          |
|-----------|-----------------------------------------------|-----------|------------------------------------------------------|
| 1         | 9 <i>H</i> -xanthen-9-one                     | 29        | 3,5-dimethoxy-9 <i>H</i> -xanthen-9-one              |
| 2         | 1-hydroxy-9 <i>H</i> -xanthen-9-one           | 30        | 1,3-dimethoxy-9 <i>H</i> -xanthen-9-one              |
| 3         | 2-hydroxy-9 <i>H</i> -xanthen-9-one           | 31        | 2,7-dimethoxy-9 <i>H</i> -xanthen-9-one              |
| 4         | 3-hydroxy-9 <i>H</i> -xanthen-9-one           | 32        | 2-hydroxy-1,8-dimethoxy-9 <i>H</i> -xanthen-9-one    |
| 5         | 4-hydroxy-9 <i>H</i> -xanthen-9-one           | 33        | 1,2,7-trimethoxy-9 <i>H</i> -xanthen-9-one           |
| 6         | 4-hydroxy-9 <i>H</i> -xanthen-9-one           | 34        | 1,5-dihydroxy-3-methoxy-9 <i>H</i> -xanthen-9-one    |
| 7         | 1-methoxy-9 <i>H</i> -xanthen-9-one           | 35        | 1,6-dihydroxy-5-methoxy-9 <i>H</i> -xanthen-9-one    |
| 8         | 2-methoxy-9 <i>H</i> -xanthen-9-one           | 36        | 1-hydroxy-5,6-dimethoxy-9 <i>H</i> -xanthen-9-one    |
| 9         | 3-methoxy-9 <i>H</i> -xanthen-9-one           | 37        | 1,5-dihydroxy-6-methoxy-9 <i>H</i> -xanthen-9-one    |
| 10        | 4-methoxy-9 <i>H</i> -xanthen-9-one           | 38        | 1-hydroxy-2,3,5-trimethoxy-9 <i>H</i> -xanthen-9-one |
| 11        | 1,2-dihydroxy-9 <i>H</i> -xanthen-9-one       | 39        | 1-hydroxy-2,3,7-trimethoxy-9 <i>H</i> -xanthen-9-one |
| 12        | 2,3-dihydroxy-9 <i>H</i> -xanthen-9-one       | 40        | 1-hydroxy-3,4,5-trimethoxy-9 <i>H</i> -xanthen-9-one |
| 13        | 3,4-dihydroxy-9 <i>H</i> -xanthen-9-one       | 41        | 1-hydroxy-3,4,7-trimethoxy-9 <i>H</i> -xanthen-9-one |
| 14        | 3,5-dihydroxy-9 <i>H</i> -xanthen-9-one       | 42        | 1-hydroxy-3,5,6-trimethoxy-9 <i>H</i> -xanthen-9-one |
| 15        | 3,6-dihydroxy-9 <i>H</i> -xanthen-9-one       | 43        | 1-hydroxy-3,5,8-trimethoxy-9 <i>H</i> -xanthen-9-one |
| 16        | 1,7-dihydroxy-9 <i>H</i> -xanthen-9-one       | 44        | 1-hydroxy-3,6,7-trimethoxy-9 <i>H</i> -xanthen-9-one |
| 17        | 1,5-dihydroxy-9 <i>H</i> -xanthen-9-one       | 45        | 1-hydroxy-3,6,8-trimethoxy-9 <i>H</i> -xanthen-9-one |
| 18        | 3-hydroxy-4-methoxy-9 <i>H</i> -xanthen-9-one | 46        | 8-hydroxy-1,2,6-trimethoxy-9 <i>H</i> -xanthen-9-one |
| 19        | 4-hydroxy-3-methoxy-9 <i>H</i> -xanthen-9-one | 47        | 2-hydroxy-1,3,7-trimethoxy-9 <i>H</i> -xanthen-9-one |
| 20        | 3-hydroxy-5-methoxy-9 <i>H</i> -xanthen-9-one | 48        | 7-hydroxy-2,3,4-trimethoxy-9 <i>H</i> -xanthen-9-one |
| 21        | 2-hydroxy-1-methoxy-9 <i>H</i> -xanthen-9-one | 49        | 3-hydroxy-1,2,4-trimethoxy-9 <i>H</i> -xanthen-9-one |
| 22        | 3-hydroxy-2-methoxy-9 <i>H</i> -xanthen-9-one | 50        | 3-hydroxy-1,2,7-trimethoxy-9 <i>H</i> -xanthen-9-one |
| 23        | 1-hydroxy-5-methoxy-9 <i>H</i> -xanthen-9-one | 51        | 3-hydroxy-1,5,6-trimethoxy-9 <i>H</i> -xanthen-9-one |
| 24        | 5-hydroxy-1-methoxy-9 <i>H</i> -xanthen-9-one | 52        | 6-hydroxy-1,2,8-trimethoxy-9 <i>H</i> -xanthen-9-one |
| 25        | 1-hydroxy-7-methoxy-9 <i>H</i> -xanthen-9-one | 53        | 4-hydroxy-2,3,6-trimethoxy-9 <i>H</i> -xanthen-9-one |
| 26        | 1,2-dimethoxy-9 <i>H</i> -xanthen-9-one       | 54        | 5-hydroxy-1,2,3-trimethoxy-9 <i>H</i> -xanthen-9-one |
| 27        | 2,3-dimethoxy-9 <i>H</i> -xanthen-9-one       | 55        | 6-hydroxy-1,3,5-trimethoxy-9 <i>H</i> -xanthen-9-one |
| 28        | 3,4-dimethoxy-9 <i>H</i> -xanthen-9-one       | 56        | 7-hydroxy-1,2,3-trimethoxy-9 <i>H</i> -xanthen-9-one |

Table S1. *Cont.*

| ID | Name                                                                   | ID  | Name                                                  |
|----|------------------------------------------------------------------------|-----|-------------------------------------------------------|
| 57 | 2-hydroxy-1,6,8-trimethoxy-9 <i>H</i> -xanthen-9-one                   | 85  | 2,8-dihydroxy-1,6-dimethoxy-9 <i>H</i> -xanthen-9-one |
| 58 | 8-hydroxy-1,3,5-trimethoxy-9 <i>H</i> -xanthen-9-one                   | 86  | 1,8-dihydroxy-2,7-dimethoxy-9 <i>H</i> -xanthen-9-one |
| 59 | 1,3,5-trihydroxy-2-methoxy-9 <i>H</i> -xanthen-9-one                   | 87  | 1,8-dihydroxy-3,5-dimethoxy-9 <i>H</i> -xanthen-9-one |
| 60 | 1,2-dihydroxy-5,6-dimethoxy-9 <i>H</i> -xanthen-9-one                  | 88  | 1,8-dihydroxy-3,6-dimethoxy-9 <i>H</i> -xanthen-9-one |
| 61 | 1,3-dihydroxy-2,5-dimethoxy-9 <i>H</i> -xanthen-9-one                  | 89  | 1,8-dihydroxy-2,6-dimethoxy-9 <i>H</i> -xanthen-9-one |
| 62 | 1,3-dihydroxy-2,7-dimethoxy-9 <i>H</i> -xanthen-9-one                  | 90  | 2,4-dihydroxy-3,6-dimethoxy-9 <i>H</i> -xanthen-9-one |
| 63 | 1,3-dihydroxy-2,8-dimethoxy-9 <i>H</i> -xanthen-9-one                  | 91  | 2,5-dihydroxy-1,6-dimethoxy-9 <i>H</i> -xanthen-9-one |
| 64 | 1,3-dihydroxy-4,5-dimethoxy-9 <i>H</i> -xanthen-9-one                  | 92  | 2,6-dihydroxy-1,5-dimethoxy-9 <i>H</i> -xanthen-9-one |
| 65 | 1,3-dihydroxy-4,7-dimethoxy-9 <i>H</i> -xanthen-9-one                  | 93  | 2,7-dihydroxy-1,8-dimethoxy-9 <i>H</i> -xanthen-9-one |
| 66 | 1,3-dihydroxy-5,6-dimethoxy-9 <i>H</i> -xanthen-9-one                  | 94  | 3,8-dihydroxy-1,2-dimethoxy-9 <i>H</i> -xanthen-9-one |
| 67 | 1,3-dihydroxy-5,8-dimethoxy-9 <i>H</i> -xanthen-9-one                  | 95  | 2,6-dihydroxy-1,8-dimethoxy-9 <i>H</i> -xanthen-9-one |
| 68 | 1,3-dihydroxy-6,7-dimethoxy-9 <i>H</i> -xanthen-9-one                  | 96  | 3,6-dihydroxy-1,5-dimethoxy-9 <i>H</i> -xanthen-9-one |
| 69 | 6,8-dihydroxy-1,2-dimethoxy-9 <i>H</i> -xanthen-9-one                  | 97  | 1,6-dihydroxy-2,8-dimethoxy-9 <i>H</i> -xanthen-9-one |
| 70 | 1,4-dihydroxy-3,5-dimethoxy-9 <i>H</i> -xanthen-9-one                  | 98  | 4,6-dihydroxy-1,3-dimethoxy-9 <i>H</i> -xanthen-9-one |
| 71 | 1,5-dihydroxy-2,3-dimethoxy-9 <i>H</i> -xanthen-9-one                  | 99  | 5,6-dihydroxy-1,3-dimethoxy-9 <i>H</i> -xanthen-9-one |
| 72 | 1,5-dihydroxy-3,4-dimethoxy-9 <i>H</i> -xanthen-9-one                  | 100 | 1,2,3-trihydroxy-5-methoxy-9 <i>H</i> -xanthen-9-one  |
| 73 | 1,5-dihydroxy-3,7-dimethoxy-9 <i>H</i> -xanthen-9-one                  | 101 | 1,2,8-trihydroxy-3-methoxy-9 <i>H</i> -xanthen-9-one  |
| 74 | 1,5-dihydroxy-3,8-dimethoxy-9 <i>H</i> -xanthen-9-one                  | 102 | 1,3,5-trihydroxy-2-methoxy-9 <i>H</i> -xanthen-9-one  |
| 75 | 1,5-dihydroxy-6,7-dimethoxy-9 <i>H</i> -xanthen-9-one                  | 103 | 1,3,5-trihydroxy-6-methoxy-9 <i>H</i> -xanthen-9-one  |
| 76 | 1,6-dihydroxy-3,5-dimethoxy-9 <i>H</i> -xanthen-9-one                  | 104 | 1,3,6-trihydroxy-5-methoxy-9 <i>H</i> -xanthen-9-one  |
| 77 | 1,6-dihydroxy-3,7-dimethoxy-9 <i>H</i> -xanthen-9-one                  | 105 | 1,3,6-trihydroxy-7-methoxy-9 <i>H</i> -xanthen-9-one  |
| 78 | 1,6-dihydroxy-5,7-dimethoxy-9 <i>H</i> -xanthen-9-one                  | 106 | 1,3,7-trihydroxy-6-methoxy-9 <i>H</i> -xanthen-9-one  |
| 79 | 3,8-dihydroxy-1,2-dimethoxy-9 <i>H</i> -xanthen-9-one                  | 107 | 2,6,8-trihydroxy-1-methoxy-9 <i>H</i> -xanthen-9-one  |
| 80 | 4,10-dihydroxy-11 <i>H</i> -[1,3]dioxolo[4,5- <i>a</i> ]xanthen-11-one | 108 | 1,3,8-trihydroxy-5-methoxy-9 <i>H</i> -xanthen-9-one  |
| 81 | 1,7-dihydroxy-2,3-dimethoxy-9 <i>H</i> -xanthen-9-one                  | 109 | 1,6,8-trihydroxy-2-methoxy-9 <i>H</i> -xanthen-9-one  |
| 82 | 1,7-dihydroxy-3,4-dimethoxy-9 <i>H</i> -xanthen-9-one                  | 110 | 1,4,7-trihydroxy-3-methoxy-9 <i>H</i> -xanthen-9-one  |
| 83 | 1,7-dihydroxy-3,5-dimethoxy-9 <i>H</i> -xanthen-9-one                  | 111 | 2,5,8-trihydroxy-1-methoxy-9 <i>H</i> -xanthen-9-one  |
| 84 | 1,7-dihydroxy-3,6-dimethoxy-9 <i>H</i> -xanthen-9-one                  | 112 | 1,4,8-trihydroxy-3-methoxy-9 <i>H</i> -xanthen-9-one  |

Table S1. Cont.

| ID  | Name                                                                   | ID  | Name                                                                                 |
|-----|------------------------------------------------------------------------|-----|--------------------------------------------------------------------------------------|
| 113 | 1,5,8-trihydroxy-3-methoxy-9 <i>H</i> -xanthen-9-one                   | 141 | 2,8-dihydroxy-1,5,6-trimethoxy-9 <i>H</i> -xanthen-9-one                             |
| 114 | 1,5,6-trihydroxy-3-methoxy-9 <i>H</i> -xanthen-9-one                   | 142 | 1,3,8-trihydroxy-4,5-dimethoxy-9 <i>H</i> -xanthen-9-one                             |
| 115 | 1,5,7-trihydroxy-3-methoxy-9 <i>H</i> -xanthen-9-one                   | 143 | 3,6,8-trihydroxy-1,2-dimethoxy-9 <i>H</i> -xanthen-9-one                             |
| 116 | 1,6,7-trihydroxy-3-methoxy-9 <i>H</i> -xanthen-9-one                   | 144 | 8-hydroxy-1,2,3,4,6-pentamethoxy-9 <i>H</i> -xanthen-9-one                           |
| 117 | 1,6,8-trihydroxy-2-methoxy-9 <i>H</i> -xanthen-9-one                   | 145 | 1,8-dihydroxy-2,3,4,6-tetramethoxy-9 <i>H</i> -xanthen-9-one                         |
| 118 | 1,2,8-trihydroxy-6-methoxy-9 <i>H</i> -xanthen-9-one                   | 146 | 1,8-dihydroxy-2,3,4,6-tetramethoxy-9 <i>H</i> -xanthen-9-one                         |
| 119 | 1,2,8-trihydroxy-3-methoxy-9 <i>H</i> -xanthen-9-one                   | 147 | 1,2,3,4,6,7-hexamethoxy-9 <i>H</i> -xanthen-9-one                                    |
| 120 | 2,4,5-trihydroxy-1-methoxy-9 <i>H</i> -xanthen-9-one                   | 148 | 1,3,5,6-tetrahydroxy-2-(3-methylbut-2-en-1-yl)-9 <i>H</i> -xanthen-9-one             |
| 121 | 3,5,6-trihydroxy-1-methoxy-9 <i>H</i> -xanthen-9-one                   | 149 | 1,3,5,6-tetrahydroxy-4-(3-methylbut-2-en-1-yl)-9 <i>H</i> -xanthen-9-one             |
| 122 | 1,3,5,6-tetrahydroxy-9 <i>H</i> -xanthen-9-one                         | 150 | 1,3-dihydroxy-5,6-dimethoxy-2-(3-methylbut-2-en-1-yl)-9 <i>H</i> -xanthen-9-one      |
| 123 | 1,3,5,7-tetrahydroxy-9 <i>H</i> -xanthen-9-one                         | 151 | 1,3,6-trihydroxy-5-methoxy-2-(3-methylbut-2-en-1-yl)-9 <i>H</i> -xanthen-9-one       |
| 124 | 1,3,5,8-tetrahydroxy-9 <i>H</i> -xanthen-9-one                         | 152 | 2,3,6,8-tetrahydroxy-1-(3-methylbut-2-en-1-yl)-9 <i>H</i> -xanthen-9-one             |
| 125 | 1,3,6,7-tetrahydroxy-9 <i>H</i> -xanthen-9-one                         | 153 | 1,5,8-trihydroxy-3-methoxy-2-(3-methylbut-2-en-1-yl)-9 <i>H</i> -xanthen-9-one       |
| 126 | 1,2,6,8-tetrahydroxy-9 <i>H</i> -xanthen-9-one                         | 154 | 1,3,5,8-tetrahydroxy-2-(3-methylbut-2-en-1-yl)-9 <i>H</i> -xanthen-9-one             |
| 127 | 8,11-dimethoxy-10 <i>H</i> -[1,3]dioxolo[4,5- <i>b</i> ]xanthen-10-one | 155 | 1,3,5,8-tetrahydroxy-4-(3-methylbut-2-en-1-yl)-9 <i>H</i> -xanthen-9-one             |
| 128 | 9,11-dimethoxy-10 <i>H</i> -[1,3]dioxolo[4,5- <i>b</i> ]xanthen-10-one | 156 | 1,4,6-trihydroxy-5-methoxy-7-(3-methylbut-2-en-1-yl)-9 <i>H</i> -xanthen-9-one       |
| 129 | 1,2,3,7-tetramethoxy-9 <i>H</i> -xanthen-9-one                         | 157 | 3,4,8-trihydroxy-2-methoxy-1-(3-methylbut-2-en-1-yl)-9 <i>H</i> -xanthen-9-one       |
| 130 | 1,2,6,8-tetramethoxy-9 <i>H</i> -xanthen-9-one                         | 158 | 1,4,5,6-tetrahydroxy-2-(2-methylbut-3-en-2-yl)-9 <i>H</i> -xanthen-9-one             |
| 131 | 1,3,4,5-tetramethoxy-9 <i>H</i> -xanthen-9-one                         | 159 | 1,5,6-trihydroxy-3-methoxy-2-(2-methylbut-3-en-2-yl)-9 <i>H</i> -xanthen-9-one       |
| 132 | 1,3,4,7-tetramethoxy-9 <i>H</i> -xanthen-9-one                         | 160 | 1,3,6,7-tetrahydroxy-4-(2-methylbut-3-en-2-yl)-9 <i>H</i> -xanthen-9-one             |
| 133 | 1,3,5,8-tetramethoxy-9 <i>H</i> -xanthen-9-one                         | 161 | 1,2,5,6-tetrahydroxy-4-(2-methylbut-3-en-2-yl)-9 <i>H</i> -xanthen-9-one             |
| 134 | 1,3,6,7-tetramethoxy-9 <i>H</i> -xanthen-9-one                         | 162 | 2,5,6-trihydroxy-1-methoxy-4-(2-methylbut-3-en-2-yl)-9 <i>H</i> -xanthen-9-one       |
| 135 | 2,3,4,5-tetramethoxy-9 <i>H</i> -xanthen-9-one                         | 163 | 1,3,5,6-tetrahydroxy-2-(3-hydroxy-3-methylbutyl)-9 <i>H</i> -xanthen-9-one           |
| 136 | 1-hydroxy-2,3,4,5-tetramethoxy-9 <i>H</i> -xanthen-9-one               | 164 | 1,3,6-trihydroxy-7-methoxy-2,5-bis(3-methylbut-2-en-1-yl)-9 <i>H</i> -xanthen-9-one  |
| 137 | 1-hydroxy-2,3,4,7-tetramethoxy-9 <i>H</i> -xanthen-9-one               | 165 | 1,3,6-trihydroxy-5-methoxy-2,7-bis(3-methylbut-2-en-1-yl)-9 <i>H</i> -xanthen-9-one  |
| 138 | 8-hydroxy-1,2,5,6-tetramethoxy-9 <i>H</i> -xanthen-9-one               | 166 | 1,3,6,7-tetrahydroxy-2,8-bis(3-methylbut-2-en-1-yl)-9 <i>H</i> -xanthen-9-one        |
| 139 | 1-hydroxy-3,5,6,7-tetramethoxy-9 <i>H</i> -xanthen-9-one               | 167 | 1,6-dihydroxy-3,7-dimethoxy-2,8-bis(3-methylbut-2-en-1-yl)-9 <i>H</i> -xanthen-9-one |
| 140 | 8-hydroxy-1,2,4,6-tetramethoxy-9 <i>H</i> -xanthen-9-one               | 168 | 1,3,6-trihydroxy-7-methoxy-2,8-bis(3-methylbut-2-en-1-yl)-9 <i>H</i> -xanthen-9-one  |

Table S1. Cont.

| ID  | Name                                                                                            | ID  | Name                                                                                              |
|-----|-------------------------------------------------------------------------------------------------|-----|---------------------------------------------------------------------------------------------------|
| 169 | 1,3,5,6-tetrahydroxy-2,4-bis(3-methylbut-2-en-1-yl)-9H-xanthen-9-one                            | 183 | 1,3,6-trihydroxy-8-(3-hydroxy-3-methylbutyl)-7-methoxy-2-(3-methylbut-2-en-1-yl)-9H-xanthen-9-one |
| 170 | 1,3,5,6-tetrahydroxy-2,7-bis(3-methylbut-2-en-1-yl)-9H-xanthen-9-one                            | 184 | 1,3,6-trihydroxy-2-(3-hydroxy-3-methylbutyl)-7-methoxy-8-(3-methylbut-2-en-1-yl)-9H-xanthen-9-one |
| 171 | 1,3,5,8-tetrahydroxy-2,4-bis(3-methylbut-2-en-1-yl)-9H-xanthen-9-one                            | 185 | 1,3,6,7-tetrahydroxy-8-(3-hydroxy-3-methylbutyl)-2-(3-methylbut-2-en-1-yl)-9H-xanthen-9-one       |
| 172 | 1,3,5,8-tetrahydroxy-2,4-bis(3-methylbut-2-en-1-yl)-9H-xanthen-9-one                            | 186 | 1,3,5,6-tetrahydroxy-2-(3-methylbut-2-en-1-yl)-4-(2-methylbut-3-en-2-yl)-9H-xanthen-9-one         |
| 173 | 1,6-dihydroxy-3,7-dimethoxy-2,8-bis(3-methylbut-2-en-1-yl)-9H-xanthen-9-one                     | 187 | 1,2,5,6-tetrahydroxy-7-(3-methylbut-2-en-1-yl)-4-(2-methylbut-3-en-2-yl)-9H-xanthen-9-one         |
| 174 | 1,3,6-trihydroxy-7-methoxy-2,8-bis(3-methylbut-2-en-1-yl)-9H-xanthen-9-one                      | 188 | 1,3,5,6-tetrahydroxy-7-(3-methylbut-2-en-1-yl)-4-(2-methylbut-3-en-2-yl)-9H-xanthen-9-one         |
| 175 | 1-hydroxy-3,6,7-trimethoxy-2,8-bis(3-methylbut-2-en-1-yl)-9H-xanthen-9-one                      | 189 | 1,3,6,7-tetrahydroxy-5-(3-methylbut-2-en-1-yl)-2-(2-methylbut-3-en-2-yl)-9H-xanthen-9-one         |
| 176 | 3,6-diethoxy-1-hydroxy-7-methoxy-2,8-bis(3-methylbut-2-en-1-yl)-9H-xanthen-9-one                | 190 | 1,3,5,6-tetrahydroxy-8-(3-methylbut-2-en-1-yl)-2-(2-methylbut-3-en-2-yl)-9H-xanthen-9-one         |
| 177 | 1-hydroxy-7-methoxy-2,8-bis(3-methylbut-2-en-1-yl)-3,6-dipropoxy-9H-xanthen-9-one               | 191 | 3,6,8-trihydroxy-2-methoxy-1-(3-methylbut-2-en-1-yl)-5-(2-methylbut-3-en-2-yl)-9H-xanthen-9-one   |
| 178 | 3,6-dibutoxy-1-hydroxy-7-methoxy-2,8-bis(3-methylbut-2-en-1-yl)-9H-xanthen-9-one                | 192 | 1,3,6-trihydroxy-5-methoxy-7-(3-methylbut-2-en-1-yl)-2-(2-methylbut-3-en-2-yl)-9H-xanthen-9-one   |
| 179 | 1-hydroxy-3,6-diisopropoxy-7-methoxy-2,8-bis(3-methylbut-2-en-1-yl)-9H-xanthen-9-one            | 193 | 1,3,6-trihydroxy-8-(3-hydroxy-3-methylbutyl)-7-methoxy-2-(3-methylbut-2-en-1-yl)-9H-xanthen-9-one |
| 180 | 3,6-bis(allyloxy)-1-hydroxy-7-methoxy-2,8-bis(3-methylbut-2-en-1-yl)-9H-xanthen-9-one           | 194 | 2,3,6,8-tetrahydroxy-1,4,7-tris(3-methylbut-2-en-1-yl)-9H-xanthen-9-one                           |
| 181 | 1-hydroxy-7-methoxy-3,6-bis((2-methylallyl)oxy)-2,8-bis(3-methylbut-2-en-1-yl)-9H-xanthen-9-one | 195 | 3,6,8-trihydroxy-2-methoxy-1,4,7-tris(3-methylbut-2-en-1-yl)-9H-xanthen-9-one                     |
| 182 | 1-hydroxy-7-methoxy-2,8-bis(3-methylbut-2-en-1-yl)-9-oxo-9H-xanthen-3,6-diyl diacetate          | 196 | 3,4,5,8-tetrahydroxy-1,2-bis(3-methylbut-2-en-1-yl)-7-(2-methylbut-3-en-2-yl)-9H-xanthen-9-one    |

Table S1. Cont.

| ID  | Name                                                                                                    | ID  | Name                                                                                                                                      |
|-----|---------------------------------------------------------------------------------------------------------|-----|-------------------------------------------------------------------------------------------------------------------------------------------|
| 198 | 1,3,5,6-tetrahydroxy-4,8-bis(3-methylbut-2-en-1-yl)-2-(2-methylbut-3-en-2-yl)-9 <i>H</i> -xanthen-9-one | 212 | 5,13-dihydroxy-3,3,10,10-tetramethyl-2,3,11,12-tetrahydro-1 <i>H</i> -dipyrano[3,2-a:2',3'- <i>i</i> ]xanthen-14(10 <i>H</i> )-one        |
| 199 | 7,12-dihydroxy-9-methoxy-2,2-dimethylpyrano[3,2- <i>b</i> ]xanthen-6(2 <i>H</i> )-one                   | 213 | 5,13-dihydroxy-3,3,10,10-tetramethyl-3 <i>H</i> -dipyrano[3,2-a:2',3'- <i>i</i> ]xanthen-14(10 <i>H</i> )-one                             |
| 200 | 7,9,12-trihydroxy-2,2-dimethylpyrano[3,2- <i>b</i> ]xanthen-6(2 <i>H</i> )-one                          | 214 | 7,14-dihydroxy-2,2,10,10-tetramethyl-9,10-dihydro-2 <i>H</i> -dipyrano[3,2-b:2',3'- <i>i</i> ]xanthen-6(8 <i>H</i> )-one                  |
| 201 | 6,10-dihydroxy-11-methoxy-3,3-dimethylpyrano[2,3- <i>c</i> ]xanthen-7(3 <i>H</i> )-one                  | 215 | 5,12-dihydroxy-2,2,10,10-tetramethyl-2 <i>H</i> -dipyrano[3,2-b:2',3'- <i>i</i> ]xanthen-6(10 <i>H</i> )-one                              |
| 202 | 6,10,11-trihydroxy-3,3-dimethylpyrano[2,3- <i>c</i> ]xanthen-7(3 <i>H</i> )-one                         | 216 | 6,13-dihydroxy-3,3,11,11-tetramethyl-3 <i>H</i> -dipyrano[3,2-b:3',2'- <i>h</i> ]xanthen-7(11 <i>H</i> )-one                              |
| 203 | 6,8,11-trihydroxy-3,3-dimethylpyrano[2,3- <i>c</i> ]xanthen-7(3 <i>H</i> )-one                          | 217 | 6,13-dihydroxy-3,3,11,11-tetramethyl-2,3-dihydro-1 <i>H</i> -dipyrano[3,2-b:3',2'- <i>h</i> ]xanthen-7(11 <i>H</i> )-one                  |
| 204 | 5,8,9-trihydroxy-1,1,2-trimethyl-1 <i>H</i> -furo[2,3- <i>c</i> ]xanthen-6(2 <i>H</i> )-one             | 218 | 8,9-dihydroxy-2,3,3,5,6,6-hexamethyl-5,6-dihydro-2 <i>H</i> -difuro[2,3-a:2',3'- <i>c</i> ]xanthen-12(3 <i>H</i> )-one                    |
| 205 | 5,9-dihydroxy-10-methoxy-1,1,2-trimethyl-1 <i>H</i> -furo[2,3- <i>c</i> ]xanthen-6(2 <i>H</i> )-one     | 219 | 5,12-dihydroxy-2,3,3,10,10-pentamethyl-2,3-dihydrofuro[2,3- <i>h</i> ]pyrano[3,2- <i>b</i> ]xanthen-6(10 <i>H</i> )-one                   |
| 206 | 5,9,10-trihydroxy-1,1,2-trimethyl-1 <i>H</i> -furo[2,3- <i>c</i> ]xanthen-6(2 <i>H</i> )-one            | 220 | 5,8-dihydroxy-2,2,10,10-tetramethyl-3,4-dihydro-2 <i>H</i> -dipyrano[2,3-a:2',3'- <i>i</i> ]xanthen-14(10 <i>H</i> )-one                  |
| 207 | 4,8,9-trihydroxy-2,3,3-trimethyl-2 <i>H</i> -furo[3,2- <i>b</i> ]xanthen-5(3 <i>H</i> )-one             | 221 | 1,4,7-trihydroxy-2-(2-hydroxypropan-2-yl)-10,10-dimethyl-1,2-dihydrofuro[3,2- <i>h</i> ]pyrano[3,2- <i>b</i> ]xanthen-6(10 <i>H</i> )-one |
| 208 | 8,9-dihydroxy-4-methoxy-2,3,3-trimethyl-2 <i>H</i> -furo[3,2- <i>b</i> ]xanthen-5(3 <i>H</i> )-one      | 222 | 7,9,12-trihydroxy-2,2-dimethyl-10-(2-methylbut-3-en-2-yl)pyrano[3,2- <i>b</i> ]xanthen-6(2 <i>H</i> )-one                                 |
| 209 | 9,10-dihydroxy-6-methoxy-3,3-dimethylpyrano[2,3- <i>c</i> ]xanthen-7(3 <i>H</i> )-one                   | 223 | 7,9,12-trihydroxy-2,2-dimethyl-8-(2-methylbut-3-en-2-yl)pyrano[3,2- <i>b</i> ]xanthen-6(2 <i>H</i> )-one                                  |
| 210 | 5,9,10-trihydroxy-2,2-dimethylpyrano[3,2- <i>b</i> ]xanthen-6(2 <i>H</i> )-one                          | 224 | 7,8,12-trihydroxy-2,2-dimethyl-10-(2-methylbut-3-en-2-yl)pyrano[3,2- <i>b</i> ]xanthen-6(2 <i>H</i> )-one                                 |
| 211 | 5,9,11-trihydroxy-3,3-dimethylpyrano[3,2- <i>a</i> ]xanthen-12(3 <i>H</i> )-one                         | 225 | 5,9,11-trihydroxy-3,3-dimethyl-10-(3-methylbut-2-en-1-yl)pyrano[3,2- <i>a</i> ]xanthen-12(3 <i>H</i> )-one                                |

Table S1. Cont.

| ID  | Name                                                                                                                          | ID  | Name                                                                                                                                              |
|-----|-------------------------------------------------------------------------------------------------------------------------------|-----|---------------------------------------------------------------------------------------------------------------------------------------------------|
| 226 | 5,9,11-trihydroxy-3,3-dimethyl-10-(2-methylbut-3-en-2-yl)pyrano[3,2- <i>a</i> ]xanthen-12(3 <i>H</i> )-one                    | 240 | 4,8-dihydroxy-9-methoxy-2,3,3-trimethyl-7-(3-methylbut-2-en-1-yl)-2 <i>H</i> -furo[3,2- <i>b</i> ]xanthen-5(3 <i>H</i> )-one                      |
| 227 | 5,9,11-trihydroxy-3,3-dimethyl-8-(3-methylbut-2-en-1-yl)pyrano[3,2- <i>a</i> ]xanthen-12(3 <i>H</i> )-one                     | 241 | 4,8,9-trihydroxy-2,3,3-trimethyl-7-(3-methylbut-2-en-1-yl)-2 <i>H</i> -furo[3,2- <i>b</i> ]xanthen-5(3 <i>H</i> )-one                             |
| 228 | 5,9,11-trihydroxy-3,3-dimethyl-8-(2-methylbut-3-en-2-yl)pyrano[3,2- <i>a</i> ]xanthen-12(3 <i>H</i> )-one                     | 242 | 4,8,9-trihydroxy-2,3,3-trimethyl-11-(3-methylbut-2-en-1-yl)-2 <i>H</i> -furo[3,2- <i>b</i> ]xanthen-5(3 <i>H</i> )-one                            |
| 229 | 7,10,12-trihydroxy-2,2-dimethyl-8-(2-methylbut-3-en-2-yl)-3,4-dihydropyrano[3,2- <i>b</i> ]xanthen-6(2 <i>H</i> )-one         | 243 | 4,8,9-trihydroxy-2,3,3-trimethyl-11-(2-methylbut-3-en-2-yl)-2 <i>H</i> -furo[3,2- <i>b</i> ]xanthen-5(3 <i>H</i> )-one                            |
| 230 | 5,9,10-trihydroxy-2,2-dimethyl-12-(2-methylbut-3-en-2-yl)pyrano[3,2- <i>b</i> ]xanthen-6(2 <i>H</i> )-one                     | 244 | 4,7,8-trihydroxy-2,3,3-trimethyl-9-(3-methylbut-2-en-1-yl)-2 <i>H</i> -furo[3,2- <i>b</i> ]xanthen-5(3 <i>H</i> )-one                             |
| 231 | 5,9,10-trihydroxy-2,2-dimethyl-12-(3-methylbut-2-en-1-yl)pyrano[3,2- <i>b</i> ]xanthen-6(2 <i>H</i> )-one                     | 245 | 4,6,9-trihydroxy-2-(2-hydroxypropan-2-yl)-11-(3-methylbut-2-en-1-yl)-2 <i>H</i> -furo[3,2- <i>b</i> ]xanthen-5(3 <i>H</i> )-one                   |
| 232 | 5,9,10-trihydroxy-2,2-dimethyl-8-(3-methylbut-2-en-1-yl)pyrano[3,2- <i>b</i> ]xanthen-6(2 <i>H</i> )-one                      | 246 | 5,7,10-trihydroxy-2-(2-hydroxypropan-2-yl)-4-(3-methylbut-2-en-1-yl)-1 <i>H</i> -furo[2,3- <i>c</i> ]xanthen-6(2 <i>H</i> )-one                   |
| 233 | 5,8-dihydroxy-9-methoxy-2,2-dimethyl-10-(3-methylbut-2-en-1-yl)pyrano[3,2- <i>b</i> ]xanthen-6(2 <i>H</i> )-one               | 247 | 5,9,10-trihydroxy-1,1,2-trimethyl-4-(2-methylbut-3-en-2-yl)-1 <i>H</i> -furo[2,3- <i>c</i> ]xanthen-6(2 <i>H</i> )-one                            |
| 234 | 5,9-dihydroxy-10-methoxy-2,2-dimethyl-12-(2-methylbut-3-en-2-yl)pyrano[3,2- <i>b</i> ]xanthen-6(2 <i>H</i> )-one              | 248 | 5,9-dihydroxy-10-methoxy-1,1,2-trimethyl-7-(3-methylbut-2-en-1-yl)-1 <i>H</i> -furo[2,3- <i>c</i> ]xanthen-6(2 <i>H</i> )-one                     |
| 235 | 5,9-dihydroxy-7-(3-hydroxy-3-methylbutyl)-8-methoxy-2,2-dimethyl-3,4-dihydropyrano[3,2- <i>b</i> ]xanthen-6(2 <i>H</i> )-one  | 249 | 5,9-dihydroxy-10-methoxy-2,2-dimethyl-11-(3-methylbut-2-en-1-yl)-3,4-dihydropyrano[2,3- <i>a</i> ]xanthen-12(2 <i>H</i> )-one                     |
| 236 | 5,8,9-trihydroxy-2,2-dimethyl-10-(3-methylbut-2-en-1-yl)pyrano[3,2- <i>b</i> ]xanthen-6(2 <i>H</i> )-one                      | 250 | 3,5,9-trihydroxy-10-methoxy-2,2-dimethyl-11-(3-methylbut-2-en-1-yl)-3,4-dihydropyrano[2,3- <i>a</i> ]xanthen-12(2 <i>H</i> )-one                  |
| 237 | 5,9-dihydroxy-8-methoxy-2,2-dimethyl-7-(3-methylbut-2-en-1-yl)pyrano[3,2- <i>b</i> ]xanthen-6(2 <i>H</i> )-one                | 251 | 5,9-dihydroxy-11-(3-hydroxy-3-methylbutyl)-10-methoxy-2,2-dimethyl-3,4-dihydropyrano[2,3- <i>a</i> ]xanthen-12(2 <i>H</i> )-one                   |
| 238 | 5,9-dihydroxy-8-methoxy-2,2-dimethyl-7-(3-methylbut-2-en-1-yl)-3,4-dihydropyrano[3,2- <i>b</i> ]xanthen-6(2 <i>H</i> )-one    | 252 | 9-hydroxy-8,10-dimethoxy-2,2-dimethyl-11-(2-methylbut-3-en-2-yl)pyrano[3,2- <i>c</i> ]xanthen-7(2 <i>H</i> )-one                                  |
| 239 | 3,5,9-trihydroxy-8-methoxy-2,2-dimethyl-7-(3-methylbut-2-en-1-yl)-3,4-dihydropyrano[3,2- <i>b</i> ]xanthen-6(2 <i>H</i> )-one | 253 | 5,12-dihydroxy-1,1,2,10,10-pentamethyl-4-(3-methylbut-2-en-1-yl)-1,2-dihydrofuro[3,2- <i>h</i> ]pyrano[3,2- <i>b</i> ]xanthen-6(10 <i>H</i> )-one |



Table S1. Cont.

| ID  | Name                                                                                                                                              | ID  | Name                                                                                                                                                                                                                                                         |
|-----|---------------------------------------------------------------------------------------------------------------------------------------------------|-----|--------------------------------------------------------------------------------------------------------------------------------------------------------------------------------------------------------------------------------------------------------------|
| 254 | 5,13-dihydroxy-3,3,10,10-tetramethyl-6-(3-methylbut-2-en-1-yl)-3 <i>H</i> -dipyrano[3,2- <i>a</i> :2',3'- <i>i</i> ]xanthen-14(10 <i>H</i> )-one  | 267 | (2 <i>S</i> ,3 <i>R</i> )-4-hydroxy-3-(1-hydroxy-3,6,7-trimethoxy-2,8-bis(3-methylbut-2-en-1-yl)-9-oxo-9 <i>H</i> -xanthen-4-yl)-2-(2-hydroxypropan-2-yl)-7,8-dimethoxy-6-(3-methylbut-2-en-1-yl)-2 <i>H</i> -furo[3,2- <i>b</i> ]xanthen-5(3 <i>H</i> )-one |
| 255 | 7,9,12-trihydroxy-2,2-dimethyl-8-(3-methylbut-2-en-1-yl)-10-(2-methylbut-3-en-2-yl)pyrano[3,2- <i>b</i> ]xanthen-6(2 <i>H</i> )-one               | 268 | 8-hydroxy-3-(3-hydroxy-4-methoxyphenyl)-2-(hydroxymethyl)-5-methoxy-2 <i>H</i> -[1,4]dioxino[2,3- <i>c</i> ]xanthen-7(3 <i>H</i> )-one                                                                                                                       |
| 256 | 5,9,11-trihydroxy-3,3-dimethyl-6,10-bis(3-methylbut-2-en-1-yl)pyrano[3,2- <i>a</i> ]xanthen-12(3 <i>H</i> )-one                                   | 269 | 8-hydroxy-3-(5-hydroxy-2,4-dimethoxyphenyl)-2-(hydroxymethyl)-5-methoxy-2 <i>H</i> -[1,4]dioxino[2,3- <i>c</i> ]xanthen-7(3 <i>H</i> )-one                                                                                                                   |
| 257 | 5,9,11-trihydroxy-3,3-dimethyl-6,8-bis(3-methylbut-2-en-1-yl)pyrano[3,2- <i>a</i> ]xanthen-12(3 <i>H</i> )-one                                    | 270 | 8-hydroxy-3-(4-hydroxy-3,5-dimethoxyphenyl)-2-(hydroxymethyl)-5-methoxy-2 <i>H</i> -[1,4]dioxino[2,3- <i>c</i> ]xanthen-7(3 <i>H</i> )-one                                                                                                                   |
| 258 | 7,10,12-trihydroxy-4-(3-hydroxy-3-methylbutyl)-2,2-dimethyl-8-(2-methylbut-3-en-2-yl)-3,4-dihydropyrano[3,2- <i>b</i> ]xanthen-6(2 <i>H</i> )-one | 271 | 3-(4-hydroxy-3,5-dimethoxyphenyl)-2-(hydroxymethyl)-5,8-dimethoxy-2 <i>H</i> -[1,4]dioxino[2,3- <i>c</i> ]xanthen-7(3 <i>H</i> )-one                                                                                                                         |
| 259 | 2,3,5,8-tetrahydroxy-1-(3-hydroxy-3-methylbutyl)-4-(3-methylbut-2-en-1-yl)-7-(2-methylbut-3-en-2-yl)-9 <i>H</i> -xanthen-9-one                    | 272 | 8,10-dihydroxy-3-(4-hydroxy-3,5-dimethoxyphenyl)-2-(hydroxymethyl)-2 <i>H</i> -[1,4]dioxino[2,3- <i>c</i> ]xanthen-7(3 <i>H</i> )-one                                                                                                                        |
| 260 | 1,3,5,6-tetrahydroxy-7-methoxy-2,4-bis(3-methylbut-2-en-1-yl)-9 <i>H</i> -xanthen-9-one                                                           |     |                                                                                                                                                                                                                                                              |
| 261 | 5,9,10-trihydroxy-8-methoxy-2,2-dimethylpyrano[3,2- <i>b</i> ]xanthen-6(2 <i>H</i> )-one                                                          |     |                                                                                                                                                                                                                                                              |
| 262 | 6,9,11-trihydroxy-5-methoxy-3,3-dimethylpyrano[3,2- <i>a</i> ]xanthen-12(3 <i>H</i> )-one                                                         |     |                                                                                                                                                                                                                                                              |
| 263 | 4,8,9-trihydroxy-11-methoxy-2,3,3-trimethyl-2 <i>H</i> -furo[3,2- <i>b</i> ]xanthen-5(3 <i>H</i> )-one                                            |     |                                                                                                                                                                                                                                                              |
| 264 | 2,2',8,8'-tetrahydroxy-9 <i>H</i> ,9' <i>H</i> -[1,1'-bixanthen]-9,9'-dione                                                                       |     |                                                                                                                                                                                                                                                              |
| 265 | 3-((1,8-dihydroxy-3,6-dimethoxy-9-oxo-9 <i>H</i> -xanthen-4-yl)oxy)-1,8-dihydroxy-4,6-dimethoxy-9 <i>H</i> -xanthen-9-one                         |     |                                                                                                                                                                                                                                                              |
| 266 | 1,1',3,4',5,6',8,8'-octahydroxy-9 <i>H</i> ,9' <i>H</i> -[2,2'-bixanthen]-9,9'-dione                                                              |     |                                                                                                                                                                                                                                                              |
